# Supplementary material for: Barley Leaf Ameliorates Citrobacter-rodentium-Induced Colitis through Arginine Enrichment
Source: MDPI journal article supplement (doi:10.3390/nu15081890), 2023-04-14
Supplement: s1 [file s1]

## Supplemental file

# Barley leaf ameliorates *Citrobacter rodentium*-induced colitis through arginine enrichment

Yu Feng, Daotong Li, Chen Ma, Xiaosong Hu, Fang Chen\*

### This file includes:

Figure S1. PLS-DA analysis of mouse colon tissue metabolites in different modes;

Figure S2. Effect of arginine intervention on gut microbiota at the phylum level;

Figure S3. Effect of arginine intervention on the genus level of gut microbiota;

Figure S4. Pathways predicted by gut microbiota function to KEGG Level 3 levels;

Table S1. The macronutrient composition of chow diet;

Table S2. Disease activity index;

Table S3. Histopathological scores.

Table S4. Primer sequences

---

**Correspondence:** College of Food Science and Nutritional Engineering, National Engineering Research Center for Fruit and Vegetable Processing, Key Laboratory of Fruit and Vegetables Processing Ministry of Agriculture, Engineering Research Centre for Engineering Vegetables Processing, Ministry of Education, China Agricultural University, Beijing 100083, China;

**E-mail:** chenfangch@sina.com; **Tel/Fax:** +86-10-62737654 ext 18.

# Figure S1

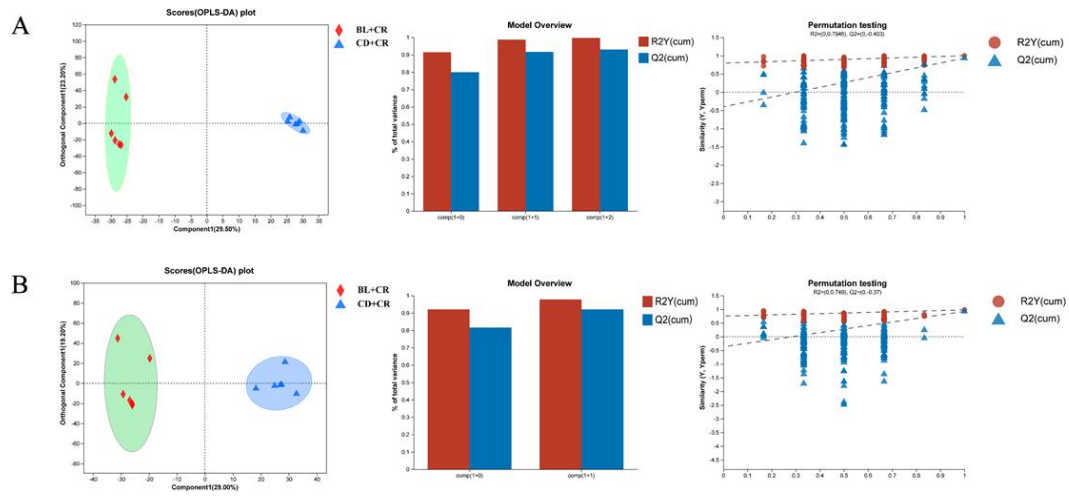

**Figure S1. PLS-DA analysis of mouse colon tissue metabolites in different modes. (A:** PLS-DA score plot and permutation test in negative ion mode; **B:** PLS-DA score plot and permutation test in positive ion mode)

## Figure S2

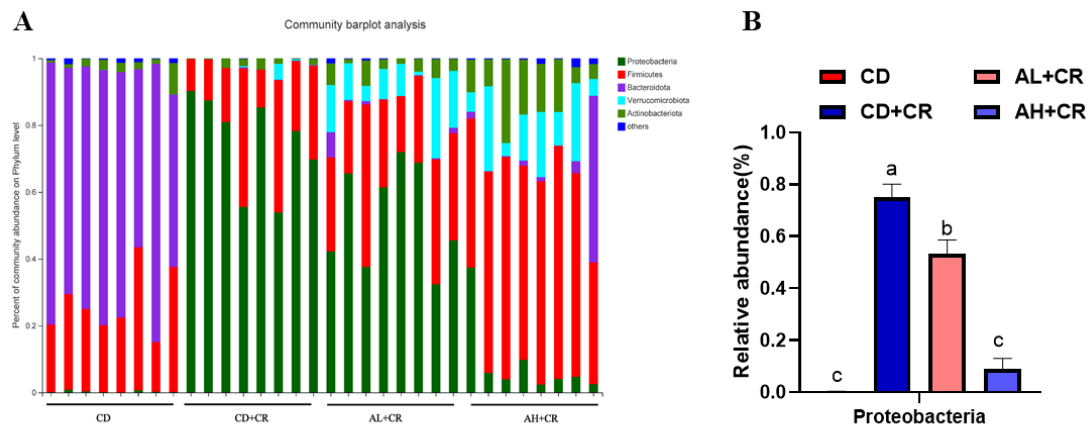

**Figure S2. Effect of arginine intervention on gut microbiota at the gate level** (A: Bar graph of community composition at the gate level; B: Relative content of Proteobacteria) All values are the mean  $\pm$  SEM,  $n = 8$  if not specified. a, b, c means in the same bar without a common letter differ at  $P < 0.05$ .

Figure S3

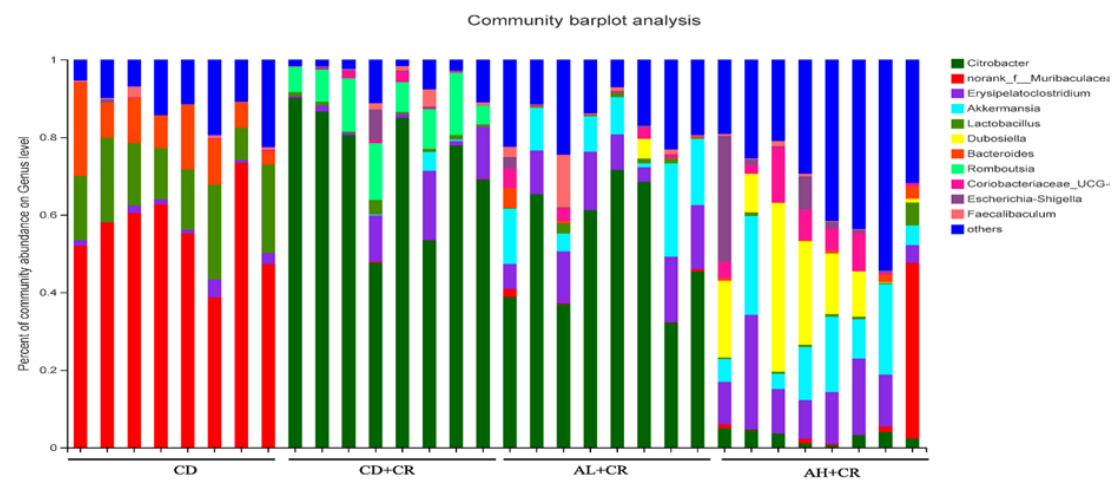

**Figure S3. Effect of arginine intervention on the genus level of gut microbiota.** Each bar represents the taxonomic composition and relative abundance of an individual mouse at the genus level.

## Figure S4

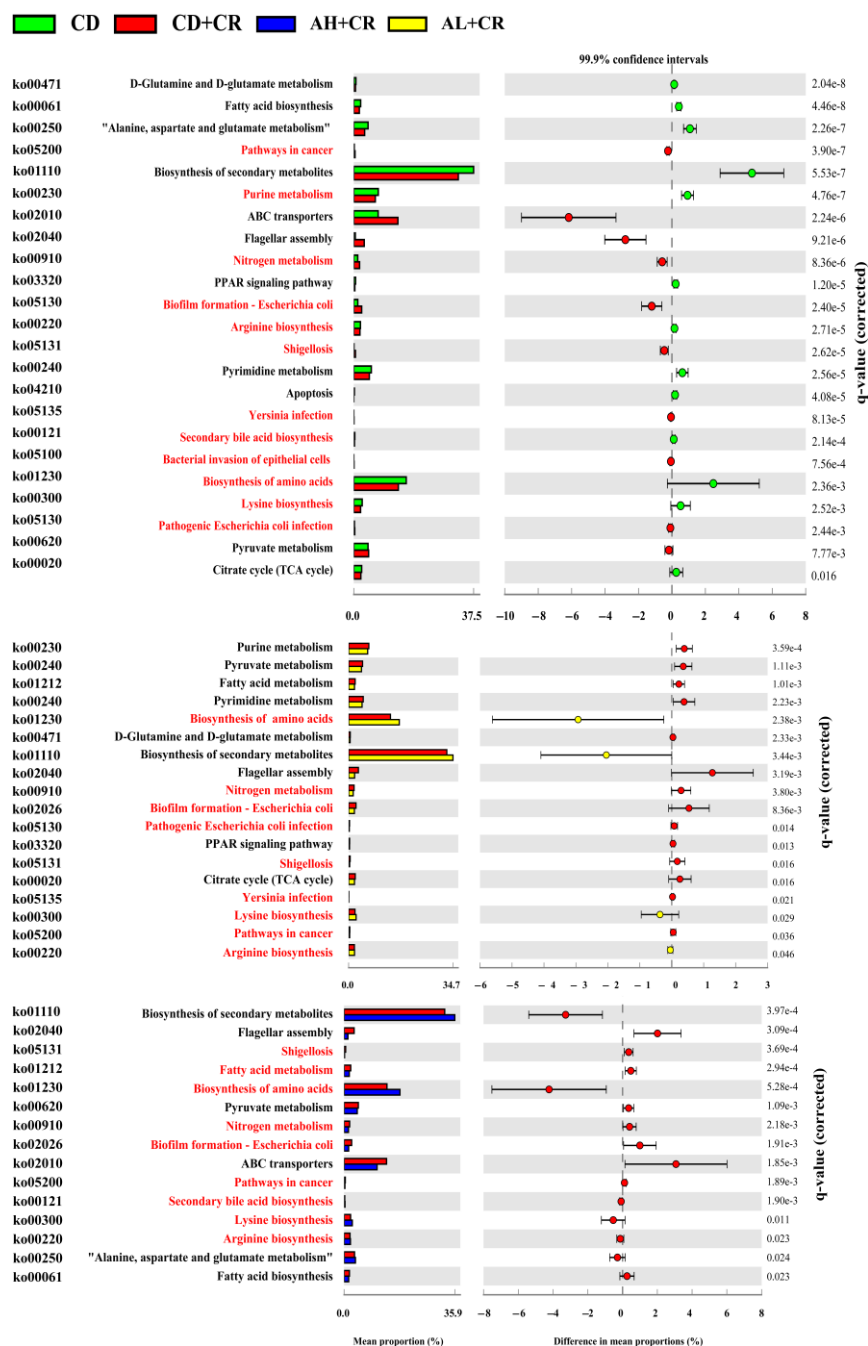

**Figure S4. Pathways predicted by gut microbiota function to KEGG Level 3 levels.**

Table S1

Table S1. The macronutrient composition of chow diet

| Ingredients (g/kg of diet) | Chow Diet |
|----------------------------|-----------|
| Casein                     | 189.58    |
| L-Cysteine                 | 2.84      |
| Corn Starch                | 298.59    |
| Maltodextrin               | 33.18     |
| Sucrose                    | 331.77    |
| Cellulose                  | 47.40     |
| Soybean oil                | 23.70     |
| Lard                       | 18.96     |
| Mineral Mix M1002          | 9.48      |
| DiCalcium Phosphate        | 12.32     |
| Calcium Carbonate          | 5.21      |
| Potassium Citrate          | 15.64     |
| Vitamin mix V10001         | 9.48      |
| Choline Bitartrate         | 1.90      |
| Total                      | 1000      |

Table S2

Table S2. Disease activity index scores

| Score | Weight loss (%) | stool consistency | general health |
|-------|-----------------|-------------------|----------------|
| 0     | 0               | Normal            | Normal         |
| 1     | 1-5             |                   | Mild           |
| 2     | 6-10            | Loose             | Moderate       |
| 3     | 11-15           |                   | Severe         |
| 4     | >16             | Diarrhea          | Moribund       |

## Table S3

**Table S3.** Histopathological scores

| Score | Inflammation                                                    | Epithelial hyperplasia                          | Erosion and ulceration                                               | Extent of lesion |
|-------|-----------------------------------------------------------------|-------------------------------------------------|----------------------------------------------------------------------|------------------|
| 0     | absent                                                          | None                                            | None                                                                 | 0                |
| 1     | minimal in mucosa                                               | mild                                            | rare erosions                                                        | <10              |
| 2     | mild affecting mucosa and sub-mucosa                            | mild with minimum goblet cell loss              | some erosions                                                        | 10-25            |
| 3     | moderate affecting mucosa, sub-mucosa, and sometimes transmural | moderate with mild goblet cell loss             | multiple erosions and ulcerations with cryptitis and crypt abscesses | 25-50            |
| 4     | severe: often transmural                                        | marked with moderate to marked goblet cell loss | ulcers associated with necrosis and fibrosis                         | >50              |



## Table S4

**Table S4.** Primer sequences

| Gene           | Primer sequence          |
|----------------|--------------------------|
| <i>rpoA</i> -F | ATTCGTCGTGCGGCTACCATTC   |
| <i>rpoA</i> -R | GAGCGGACAGTCAATTCCAGATCG |
| <i>Tir</i> -F  | CTTCAGGAATGGGAGATGGA     |
| <i>Tir</i> -R  | CAACCGCCTGAACAATACCT     |
| <i>EspA</i> -F | AGTGATCTTGCGGCTGAGTT     |
| <i>EspA</i> -R | ATCCACCGTCGTTGTCAAAT     |
| <i>Map</i> -F  | AGCGGTTGAAAGCGTGATAC     |
| <i>Map</i> -R  | CTTTACCGCACTGCTCATCA     |
